# Supplementary material
Source: PubMed Central journal article supplement (PMC4470748)

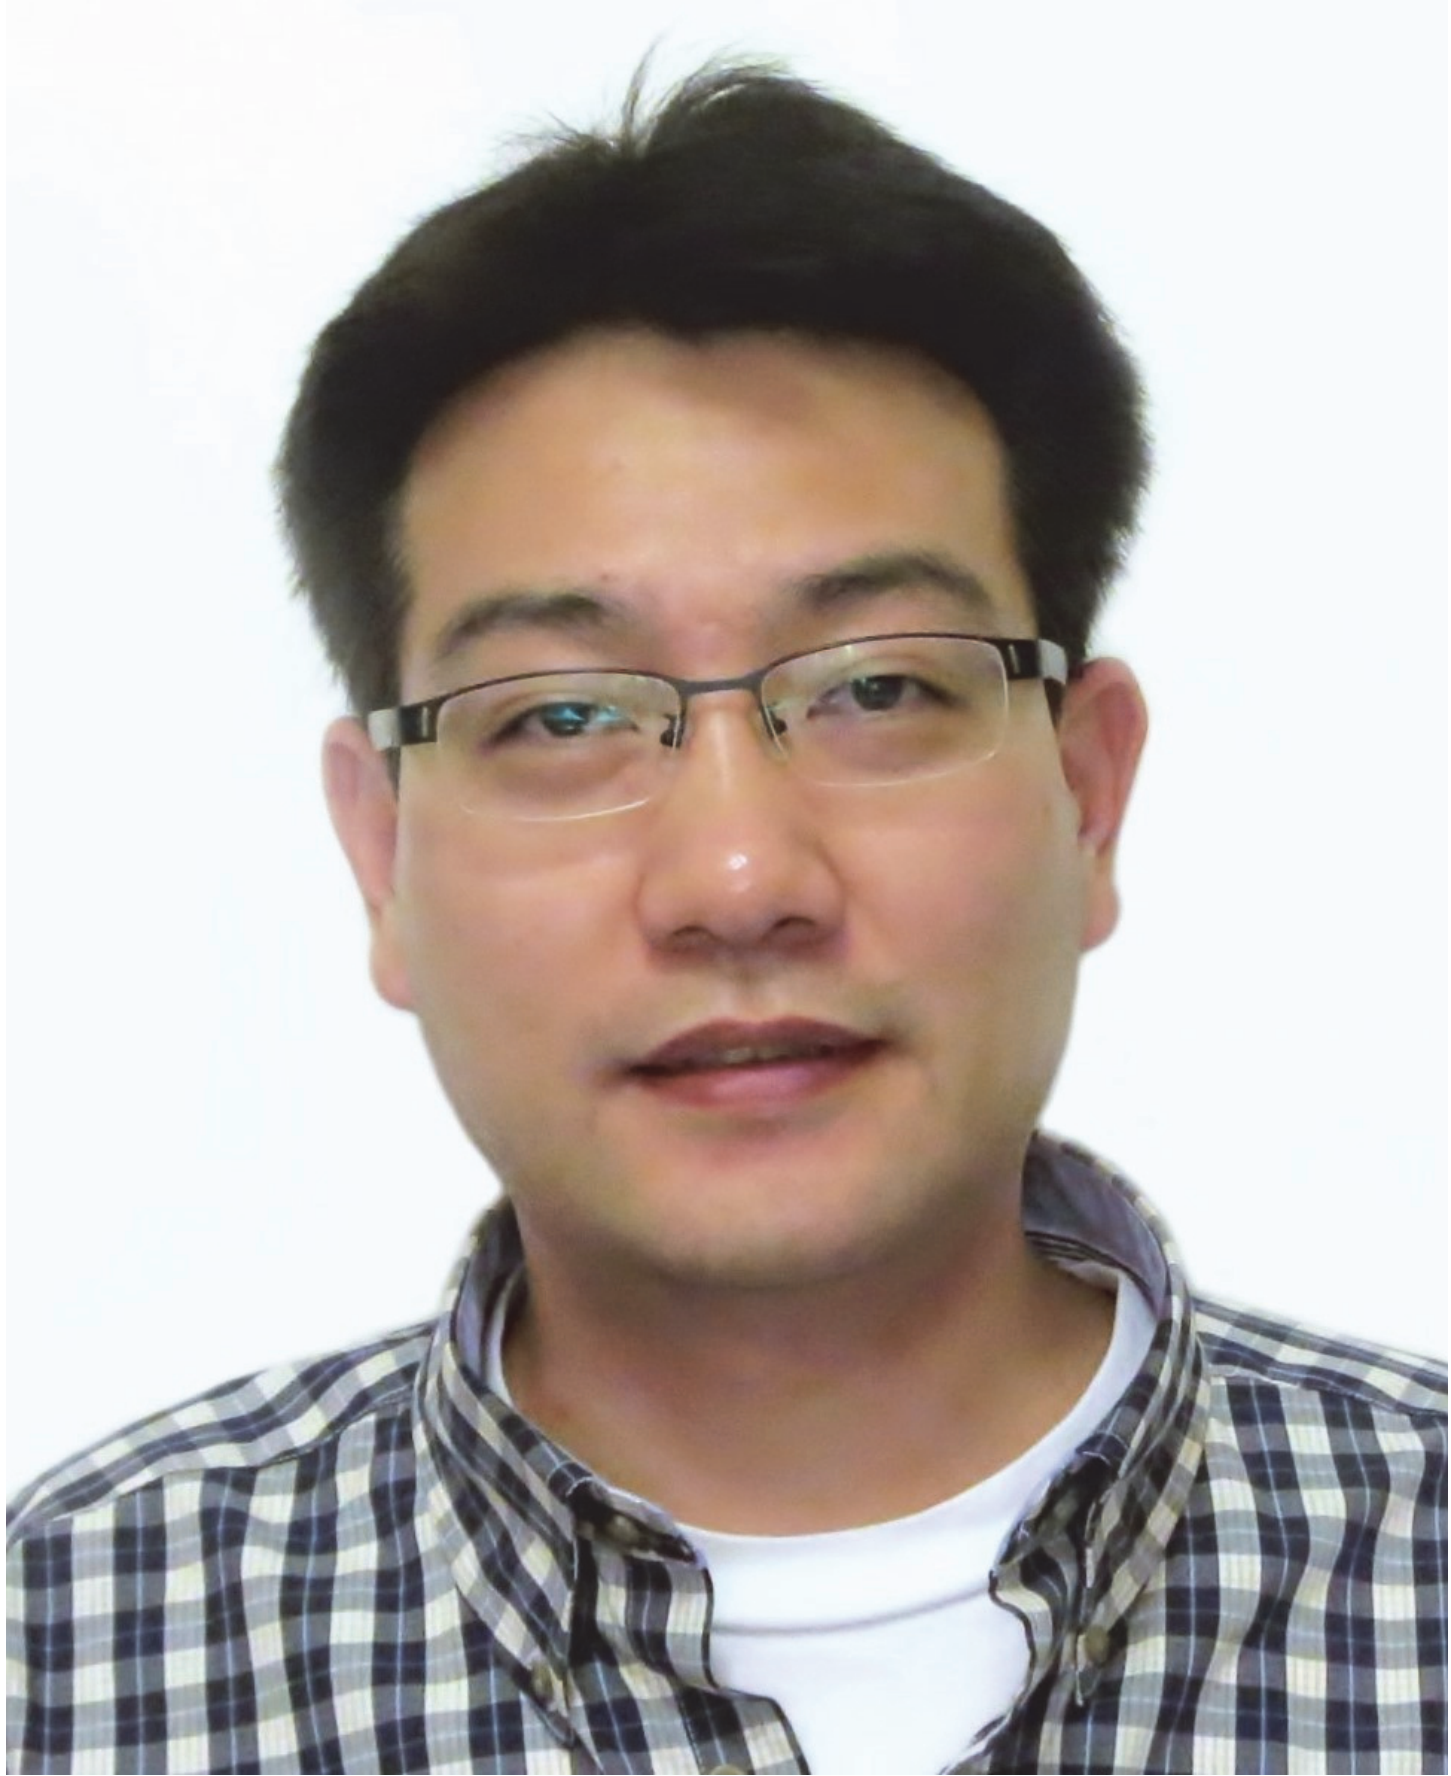

Supplement: NIHMS691171-supplement-Author_Biography_2.pdf [file NIHMS691171-supplement-Author_Biography_2.pdf]

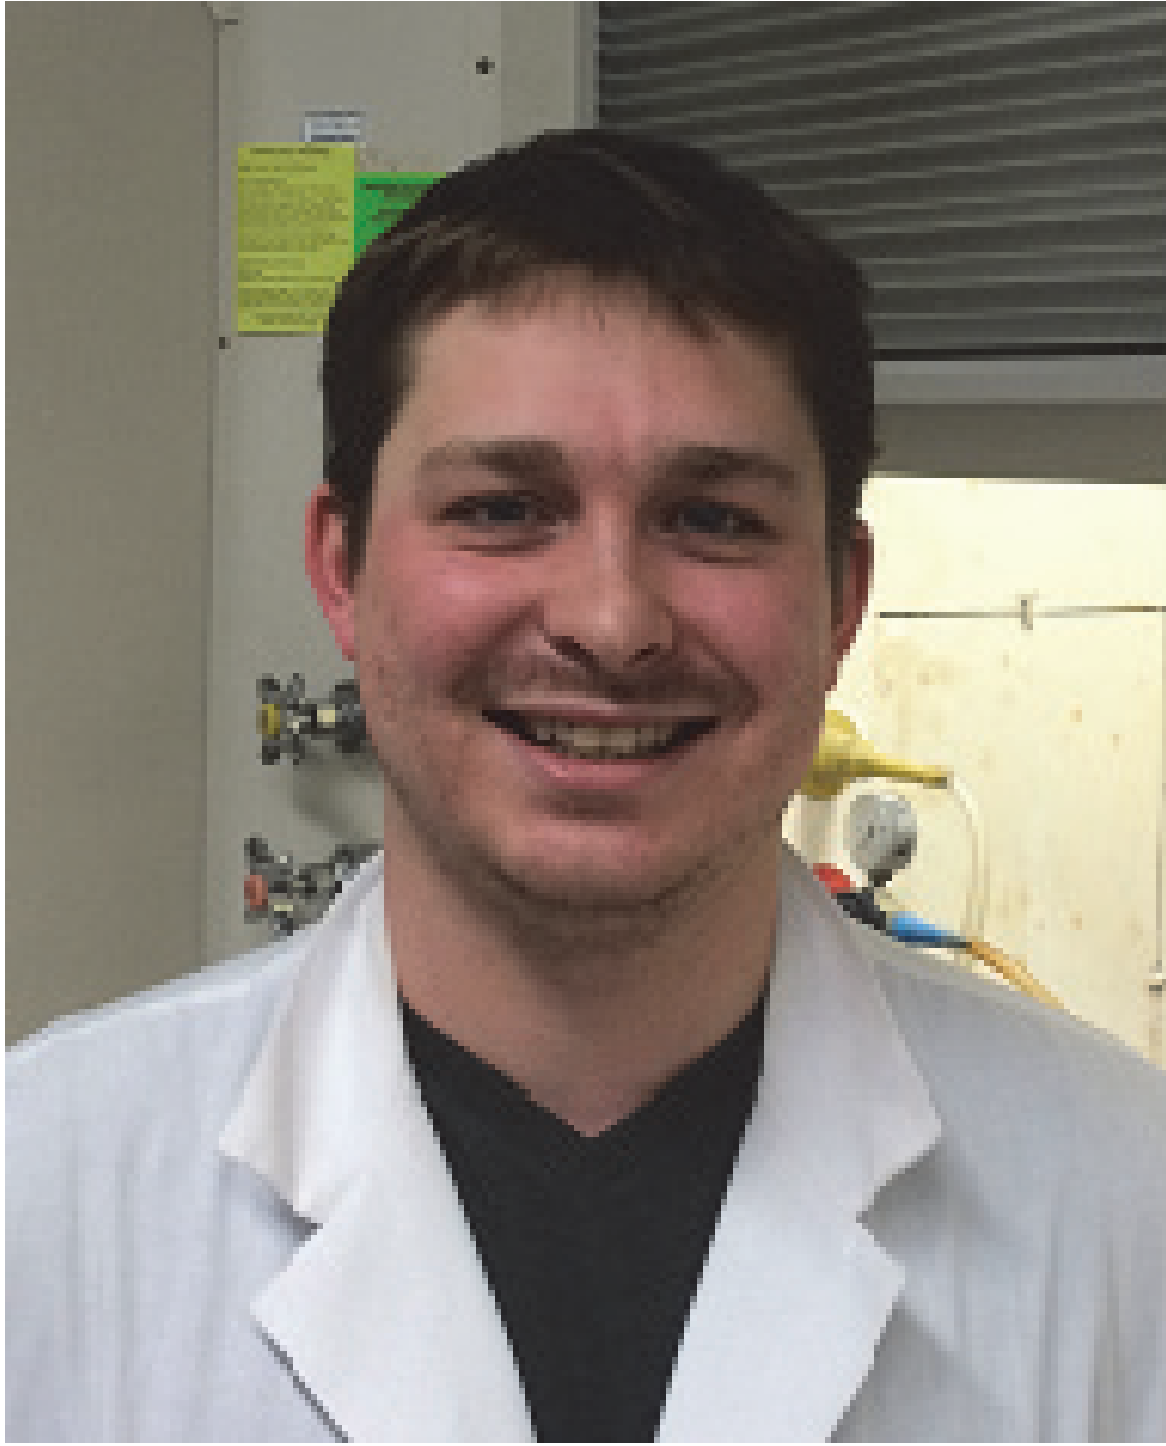

Supplement: NIHMS691171-supplement-Author_Biography_3.pdf [file NIHMS691171-supplement-Author_Biography_3.pdf]

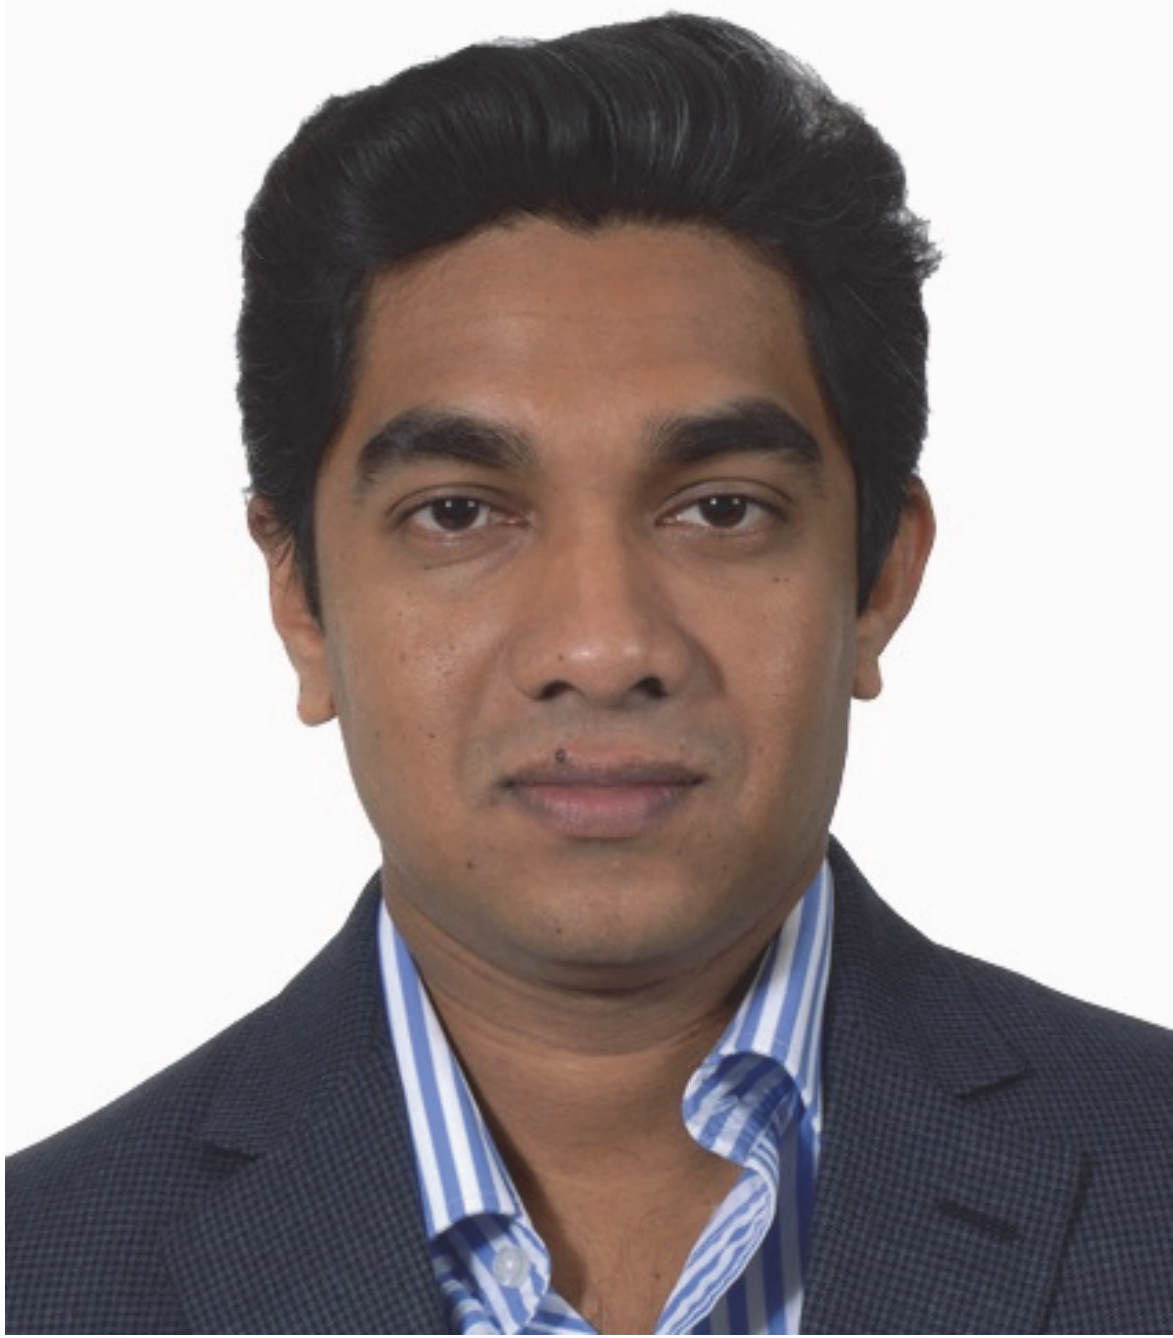

Supplement: NIHMS691171-supplement-Author_Biography_5.pdf [file NIHMS691171-supplement-Author_Biography_5.pdf]
